# Supplementary material
Source: PubMed Central journal article supplement (PMC4927303)
Supplement: NIHMS218620-supplement-01.pdf [file NIHMS218620-supplement-01.pdf]

Table 1. Giardia homologs of flagellar-associated proteins

|                                                           | GiardiaDB                 | Gene Name                          | Family                                                                                             | PFAM                 | Molecular function   | disease/svmtoms                                                   | FABP | FlixCut        | Proteomes |    |                        | References              |
|-----------------------------------------------------------|---------------------------|------------------------------------|----------------------------------------------------------------------------------------------------|----------------------|----------------------|-------------------------------------------------------------------|------|----------------|-----------|----|------------------------|-------------------------|
|                                                           |                           |                                    |                                                                                                    |                      |                      |                                                                   |      |                | Cre       | Hs | Tt                     |                         |
| <b>microtubules (MTs)</b>                                 | GLS0803_103676            | alpha-tubulin 1                    | tubulin                                                                                            | PF00091              | MT Metabolism        |                                                                   |      |                |           |    |                        | Morrison et al. (2007)  |
|                                                           | GLS0803_112079            | alpha-tubulin 2                    | tubulin                                                                                            | PF00091              | MT Metabolism        |                                                                   |      |                |           |    |                        | Morrison et al. (2007)  |
|                                                           | GLS0803_101291            | beta-tubulin 1                     | tubulin                                                                                            | PF00091              | MT Metabolism        |                                                                   |      |                |           |    |                        | Morrison et al. (2007)  |
|                                                           | GLS0803_136021            | beta-tubulin 2                     | tubulin                                                                                            | PF00091              | MT Metabolism        |                                                                   |      |                |           |    |                        | Morrison et al. (2007)  |
|                                                           | GLS0803_136020            | beta-tubulin 3                     | tubulin                                                                                            | PF00091              | MT Metabolism        |                                                                   |      |                |           |    |                        | Morrison et al. (2007)  |
| <b>gamma Turc/Tusc complex (3)</b>                        | GLS0803_17429             | gcp-2                              | Spc97_Spc98                                                                                        | PF04130              | MT Metabolism        |                                                                   |      |                |           |    |                        | Morrison et al. (2007)  |
|                                                           | GLS0803_12057             | gcp-3                              | Spc97_Spc98                                                                                        | PF04130              | MT Metabolism        |                                                                   |      |                |           |    |                        | Morrison et al. (2007)  |
|                                                           | GLS0803_114218            | gamma-tubulin                      | tubulin                                                                                            | PF00091              | MT Metabolism        |                                                                   |      |                |           |    |                        | Morrison et al. (2007)  |
| <b>Basal-body associated (11)</b>                         | GLS0803_104685            | caltractin                         | caltractin                                                                                         | PF00036              | Signalling           |                                                                   |      |                |           |    |                        | Meng et al. (1996)      |
|                                                           | GLS0803_6744              | centrin                            | centrin                                                                                            | PF00036              | Signalling           |                                                                   |      |                |           |    |                        | Belhadri et al. (1995)  |
|                                                           | GLS0803_5462              | delta-tubulin                      | tubulin                                                                                            | PF00091              | MT Metabolism        |                                                                   |      |                |           |    |                        | Morrison et al. (2007)  |
|                                                           | GLS0803_6336              | epsilon-tubulin                    | tubulin                                                                                            | PF00091              | MT Metabolism        |                                                                   |      |                |           |    |                        | Morrison et al. (2007)  |
|                                                           | GLS0803_5167              | VFL3                               | centriole positioning                                                                              | none                 |                      | C8 deficiency, type I                                             | Y    | MotileCut only |           |    |                        | Merchant et al. (2007)  |
|                                                           | GLS0803_15956             | FAP52                              | Basal body proteome BUG14                                                                          | SSF50978             | Protein interaction  | Radin antigen; Scianna system; Bone mineral density variability 3 |      | CentricOnly    | Y         |    |                        | Keller et al. (2005)    |
|                                                           | GLS0803_15455             | PACRG1                             | basal body proteome as BUG21; PACRG parkin co-regulated gene. E04F6.2 like protein                 | PF10274              |                      | Iq36 deletion syndrome; Bone mineral density variability 3        | Y    | CentricOnly    | Y         | Y  |                        | Keller et al. (2005)    |
|                                                           | GLS0803_13372             | FAP45                              | BUG28                                                                                              | SSF50978             |                      | Leukemia, acute pre-B-cell; Atherosclerosis                       |      | Centric+Motile | Y         | Y  |                        | Keller et al. (2005)    |
|                                                           | GLS0803_32375             | POC18                              | Basal body proteome                                                                                | none                 | Protein interaction  | Epilepsy; Macular dystrophy                                       | Y    | MotileCut only |           |    |                        | Keller et al. (2005)    |
|                                                           | GLS0803_33762             | POC1                               | Basal body proteome WD repeat protein                                                              | SSF50978             | Protein interaction  |                                                                   |      | MotileCut only | Y         | Y  | Y                      | Keller et al. (2005)    |
|                                                           | GLS0803_14135             | NDK7                               | (BUG5) in basal body proteome as BUG5.                                                             |                      |                      |                                                                   |      |                |           |    |                        |                         |
| <b>BBSome (5)</b>                                         | GLS0803_8738              | BBS1                               |                                                                                                    | none                 |                      | BBS, C8 deficiency, type I                                        |      |                |           |    |                        | Morrison et al. (2007)  |
|                                                           | GLS0803_23934             | BBS2                               |                                                                                                    | none                 |                      | BBS, C8 deficiency, type I                                        | Y    | CiliaCut only  |           |    |                        | Morrison et al. (2007)  |
|                                                           | GLS0803_10529             | BBS4                               | TPR_1 Tetratricopeptide repeat                                                                     | PF01515              | Protein interaction  | BBS, C8 deficiency, type I                                        | Y    | CiliaCut only  |           |    |                        | Morrison et al. (2007)  |
|                                                           | GLS0803_8146              | BBS5                               | DUF1448 domain of unknown function                                                                 | PF07289              | Protein interaction  | BBS, C8 deficiency, type I                                        | Y    | CiliaCut only  |           |    |                        | Morrison et al. (2007)  |
|                                                           | GLS0803_8508              | BBS8                               | TPR_1 Tetratricopeptide repeat                                                                     | PF01515              | Protein interaction  | BBS, C8 deficiency, type I                                        |      |                |           |    |                        | Morrison et al. (2007)  |
| <b>Axoneme structure (30)<br/>axonemal dyneins (IDAs)</b> | GLS0803_100906            | IAD-1alpha                         | IAD-1alpha dynein heavy chain (DHC) family                                                         | PF03028              | Flagellar structure  |                                                                   |      |                |           |    |                        | Wickstead et al. (2007) |
|                                                           | GLS0803_94440             | IAD-1beta                          | IAD-1beta dynein heavy chain (DHC) family                                                          | PF03028              | Flagellar structure  |                                                                   |      |                |           |    |                        | Wickstead et al. (2007) |
|                                                           | GLS0803_40496             | IAD-4                              | IAD-4 dynein heavy chain (DHC) family                                                              | PF03028              | Flagellar structure  |                                                                   |      |                |           |    |                        | Wickstead et al. (2007) |
|                                                           | GLS0803_37985             | IAD-4                              | IAD-4 dynein heavy chain (DHC) family, partial                                                     | PF03028              | Flagellar structure  |                                                                   |      |                |           |    |                        | Wickstead et al. (2007) |
|                                                           | GLS0803_111950            | IAD-5                              | IAD-5 dynein heavy chain (DHC) family                                                              | PF03028              | Flagellar structure  |                                                                   |      |                |           |    |                        | Wickstead et al. (2007) |
| <b>axonemal dyneins (ODAs)</b>                            | GLS0803_17265             | OAD-alpha                          | OAD-alpha dynein heavy chain (DHC) family                                                          | PF03028              | Flagellar structure  |                                                                   |      |                |           |    |                        | Wickstead et al. (2007) |
|                                                           | GLS0803_17243             | OAD-beta                           | OAD-beta dynein heavy chain (DHC) family                                                           | PF03028              | Flagellar structure  |                                                                   |      |                |           |    |                        | Wickstead et al. (2007) |
| <b>radial spokes</b>                                      | GLS0803_16450             | rsp3                               | radial spoke protein 3                                                                             | PF06098              | Flagellar structure  |                                                                   | Y    | CentricOnly    |           |    |                        | Morrison et al. (2007)  |
|                                                           | GLS0803_17278             | RSP9                               | radial spoke protein 9; A subunit in the radial spoke head; (pf17)                                 | none                 | Flagellar structure  |                                                                   | Y    | MotileCut only | Y         | Y  |                        | Morrison et al. (2007)  |
|                                                           | GLS0803_114462            | axonemal p66 (RSP6)                | outer dynein arm-docking complex subunit 2 (ODA-DC 2)                                              | none                 | Flagellar structure  |                                                                   | Y    | Centric+Motile | Y         | Y  |                        | Morrison et al. (2007)  |
| <b>dynein regulatory complex</b>                          | GLS0803_16540             | PF2                                | Component of dynein regulatory complex (DRC) of flagellar axoneme; trypanin                        | PD936484             | Flagellar structure  |                                                                   | Y    | Centric+Motile | Y         | Y  |                        | Morrison et al. (2007)  |
| <b>central pair</b>                                       | GLS0803_16500             | PF20                               | Central Pair-WD-repeat protein of the central pair; associates with the intermicrotubule bridge.   | PF00400              | Flagellar structure  |                                                                   | Y    | MotileCut only | Y         |    |                        | Morrison et al. (2007)  |
|                                                           | GLS0803_16202             | PF16                               | Central pair associated protein                                                                    | PF00514              | Flagellar structure  | Bone mineral density variability 3                                |      | MotileCut only | Y         | Y  |                        | Morrison et al. (2007)  |
|                                                           | GLS0803_137712            | HY3 (FAP74)                        | (HYD3) Similar to mouse hydrocephaly protein hyd3 HY3                                              | SSF52540             | Flagellar structure  | Mouse: Hydrocephaly                                               | Y    | MotileCut only | Y         | Y  |                        | Morrison et al. (2007)  |
|                                                           | GLS0803_14568             | PP1                                | Ser/Thr protein phosphatase PPI-alpha 2 catalytic subunit                                          | SSF56300             | Signalling           |                                                                   |      | MotileCut only | Y         | Y  |                        | Morrison et al. (2007)  |
| <b>axoneme-associated</b>                                 | GLS0803_11867             | RIB43a                             | associated with protofilament; ribbons of flagellar microtubules                                   | PF05914              | Flagellar structure  |                                                                   | Y    | Centric+Motile | Y         | Y  |                        | Morrison et al. (2007)  |
|                                                           | GLS0803_41512             | RIB72                              | novel component of the ribbon compartment of flagellar MTs                                         | P551336              | Flagellar structure  |                                                                   | Y    | Centric+Motile | Y         | Y  |                        | Morrison et al. (2007)  |
|                                                           | GLS0803_16263             | DIP13                              | Diffusible/inducible protein; Sjogren's syndrome nuclear autoantigen 1.                            | PD968187             | MT Metabolism        | Amyotrophic lateral sclerosis-4; Leukemia                         | Y    | CentricOnly    | Y         | Y  |                        | Morrison et al. (2007)  |
|                                                           | GLS0803_102248            | MBO2                               | Move backward only mutant defective in ciliary waveform.                                           | PD936484             | Protein interaction  | Aneurysm, intracranial berry                                      | Y    | Centric+Motile | Y         | Y  |                        | Morrison et al. (2007)  |
|                                                           | GLS0803_14048             | EB1                                | EB1                                                                                                | PF03271              | MT Metabolism        |                                                                   |      |                |           |    |                        | Dawson et al. (2007)    |
|                                                           | GLS0803_5333              | calmodulin                         | EF-hand domain                                                                                     | SSF47473             | Signalling           |                                                                   |      |                |           |    |                        | Morrison et al. (2007)  |
|                                                           | GLS0803_7439              | PP2A                               | Ser/Thr phosphatase 2A, 65kDa reg sub A; ARM repeat domain                                         | SSF48371             | Signalling           |                                                                   |      |                |           |    |                        | Morrison et al. (2007)  |
| GLS0803_14004                                             | long-flagella protein LF4 | protein kinase domain (MAP kinase) | PF00069                                                                                            | Flagellar regulation |                      |                                                                   |      |                |           |    | Morrison et al. (2007) |                         |
| <b>axoneme-associated (Giardia)</b>                       | GLS0803_137716            | GASP-180                           | ankyrin repeat family                                                                              | PF00023              | Protein interaction  |                                                                   |      |                |           |    |                        | Elmendorf et al. (2005) |
|                                                           | GLS0803_5649              | alpha 10-giardin                   | anexin                                                                                             | PF00191              | Protein interaction  |                                                                   |      |                |           |    |                        | Weiland et al. (2005)   |
|                                                           | GLS0803_15097             | alpha 14-giardin                   | anexin                                                                                             | PF00191              | Protein interaction  |                                                                   |      |                |           |    |                        | Weiland et al. (2005)   |
|                                                           | GLS0803_15101             | alpha 17-giardin                   | anexin                                                                                             | PF00191              | Protein interaction  |                                                                   |      |                |           |    |                        | Weiland et al. (2005)   |
|                                                           | GLS0803_7796              | alpha 2-giardin                    | anexin                                                                                             | PF00191              | Protein interaction  |                                                                   |      |                |           |    |                        | Weiland et al. (2005)   |
|                                                           | GLS0803_7797              | alpha 5-giardin                    | anexin                                                                                             | PF00191              | Protein interaction  |                                                                   |      |                |           |    |                        | Weiland et al. (2005)   |
|                                                           | GLS0803_103437            | alpha 9-giardin                    | anexin                                                                                             | PF00191              | Protein interaction  |                                                                   |      |                |           |    |                        | Weiland et al. (2005)   |
| <b>Axoneme-associated (40 putative)</b>                   | GLS0803_12046             | SPEF1                              |                                                                                                    | SSF47576             | Signalling           |                                                                   | Y    | MotileCut only |           |    |                        | Merchant et al. (2007)  |
|                                                           | GLS0803_24423             | SSA17                              |                                                                                                    | SSF51045             | Protein interaction  |                                                                   |      | CentricOnly    |           |    |                        | Merchant et al. (2007)  |
|                                                           | GLS0803_13809             | TEX9                               | (FBB15)                                                                                            | SSF46966             | Protein interaction  | C8 deficiency, type I                                             | Y    | MotileCut only |           |    |                        | Merchant et al. (2007)  |
|                                                           | GLS0803_4538              | DPY30                              | (FBB12) chromatin modifying protein complex member; C. elegans defective in male sensory behavior. | PF05186              | Protein interaction  |                                                                   | Y    | CentricOnly    |           | Y  |                        | Merchant et al. (2007)  |
|                                                           | GLS0803_15834             | CTO59                              | (FBB5) Similar to C21orf59 (CTO59)                                                                 |                      |                      |                                                                   | Y    | MotileCut only |           |    |                        | Merchant et al. (2007)  |
|                                                           | GLS0803_2523              | FAP100                             |                                                                                                    | none                 |                      | Renal cell carcinoma; Glaucoma 1C, primary open angle             | Y    | Centric+Motile | Y         |    |                        | Merchant et al. (2007)  |
|                                                           | GLS0803_87817             | FAP118                             | Tubby superfamily protein                                                                          | SSF50978             | Protein interaction  |                                                                   | Y    | CiliaCut only  | Y         |    |                        | Merchant et al. (2007)  |
|                                                           | GLS0803_9865              | FAP122                             |                                                                                                    | PD968187             | Signalling           |                                                                   | Y    | MotileCut only | Y         |    |                        | Merchant et al. (2007)  |
|                                                           | GLS0803_17567             | FAP134                             | Protein phosphatase PPI regulatory subunit SDS22                                                   | SSF52075             | Protein interaction  | Bone mineral density variability 3                                | Y    | MotileCut only | Y         |    |                        | Merchant et al. (2007)  |
|                                                           | GLS0803_6245              | FAP155                             |                                                                                                    | SSF52047             | Protein interaction  |                                                                   | Y    | MotileCut only | Y         |    |                        | Merchant et al. (2007)  |
|                                                           | GLS0803_22806             | FAP184                             |                                                                                                    | SSF46579             | Protein modification |                                                                   | Y    | MotileCut only | Y         | Y  |                        | Merchant et al. (2007)  |

Table 1. Giardia homologs of flagellar-associated proteins

|                                            |                      |                                                                                                |          |                     |                                                                          |   |                |   |   |                         |
|--------------------------------------------|----------------------|------------------------------------------------------------------------------------------------|----------|---------------------|--------------------------------------------------------------------------|---|----------------|---|---|-------------------------|
| GLS0803_17116                              | FAP198               | cyt-b5-like domain in the N terminus                                                           | SSF55856 | Metabolism          | Radix antigen; Scianna system; Bone mineral density variability 3        | Y | MotileCut only | Y |   | Merchant et al. (2007)  |
| GLS0803_15364                              | FAP251               |                                                                                                | SSF50978 | Protein interaction |                                                                          | Y | MotileCut only | Y |   | Merchant et al. (2007)  |
| GLS0803_6455                               | FAP263               |                                                                                                | none     |                     | C8 deficiency, type I                                                    | Y | MotileCut only | Y |   | Merchant et al. (2007)  |
| GLS0803_16768                              | FAP43                |                                                                                                | SSF50978 | Protein interaction |                                                                          | Y | MotileCut only | Y |   | Merchant et al. (2007)  |
| GLS0803_21048                              | FAP47                |                                                                                                | none     |                     |                                                                          | Y | CiliaCut only  | Y |   | Merchant et al. (2007)  |
| GLS0803_102438                             | FAP44                | WD40-repeat like                                                                               | SSF50978 | Protein interaction |                                                                          | Y | MotileCut only | Y |   | Merchant et al. (2007)  |
| GLS0803_37452                              | FAP50                |                                                                                                | none     |                     |                                                                          | Y | MotileCut only | Y |   | Merchant et al. (2007)  |
| GLS0803_11321                              | FAP57                | WD40-repeat like                                                                               | SSF50978 | Protein interaction | Deafness, autosomal dominant 2                                           | Y | MotileCut only | Y |   | Merchant et al. (2007)  |
| GLS0803_95653                              | FAP59                |                                                                                                | none     |                     |                                                                          | Y | MotileCut only | Y |   | Li et al. (2004)        |
| GLS0803_5186                               | FAP61                |                                                                                                | none     |                     |                                                                          | Y | MotileCut only | Y | Y | Merchant et al. (2007)  |
| GLS0803_16709                              | FAP66                | TPR repeat domain                                                                              | SSF48452 | Protein interaction |                                                                          | Y | CiliaCut only  | Y |   | Merchant et al. (2007)  |
| GLS0803_10924                              | FAP73                |                                                                                                | none     |                     | Radix antigen; Scianna system; Bone mineral density variability 3        | Y | Centric+Motile | Y |   | Merchant et al. (2007)  |
| GLS0803_9283                               | FAP74                |                                                                                                | none     |                     | Ip36 deletion syndrome; Bone mineral density variability 3               | Y | MotileCut only | Y |   | Merchant et al. (2007)  |
| GLS0803_10879                              | FAP253               | FBB4                                                                                           | none     |                     |                                                                          | Y | MotileCut only | Y |   | Merchant et al. (2007)  |
| GLS0803_8423                               | FBB11                |                                                                                                | none     |                     |                                                                          | Y | Centric+Motile | Y |   | Merchant et al. (2007)  |
| GLS0803_8942                               | FBB5                 |                                                                                                | none     |                     |                                                                          | Y | MotileCut only | Y |   | Merchant et al. (2007)  |
| GLS0803_102438                             | FBB17                |                                                                                                | PF00246  | Protein metabolism  |                                                                          | Y | MotileCut only | Y |   | Li et al. (2004)        |
| GLS0803_21110                              | FBB9                 |                                                                                                | none     |                     |                                                                          | Y | MotileCut only | Y |   | Merchant et al. (2007)  |
| GLS0803_5787                               | MOT12                |                                                                                                | SSF52540 | Protein metabolism  |                                                                          | Y | MotileCut only | Y |   | Merchant et al. (2007)  |
| GLS0803_24043                              | MOT16                | CH domain                                                                                      | SSF47576 | Signalling          |                                                                          | Y | MotileCut only | Y |   | Merchant et al. (2007)  |
| GLS0803_23330                              | MOT17                |                                                                                                | SSF52540 | Signalling          | Rippling muscle disease-1                                                | Y | MotileCut only | Y |   | Merchant et al. (2007)  |
| GLS0803_11638                              | MOT18                | Topoisomerase I-related protein                                                                | SSF81301 | RNA metabolism      |                                                                          | Y | MotileCut only | Y |   | Merchant et al. (2007)  |
| GLS0803_7792                               | MOT37                |                                                                                                | SSF52075 | Protein interaction | Ip36 deletion syndrome; Bone mineral density variability 3               | Y | MotileCut only | Y |   | Merchant et al. (2007)  |
| GLS0803_4897                               | MOT39                |                                                                                                | SSF57850 | Protein turnover    | Triphalangeal thumb-polysyndactyly syndrome                              | Y | MotileCut only | Y |   | Merchant et al. (2007)  |
| GLS0803_15868                              | MOT4                 |                                                                                                | SSF57850 | Protein turnover    |                                                                          | Y | MotileCut only | Y |   | Merchant et al. (2007)  |
| GLS0803_13441                              | MOTS2                | Microtubule Regulation and Metabolism (FAP106)                                                 | none     |                     | Flagellar structure                                                      | Y | Centric+Motile | Y |   | Merchant et al. (2007)  |
| GLS0803_16996                              | NKRIN1               |                                                                                                | none     |                     | Signalling                                                               | Y | Centric+Motile | Y |   | Merchant et al. (2007)  |
| GLS0803_27147                              | UNC119               | Signal transduction protein                                                                    | SSF81296 | Trafficking         | Bone mineral density variability 3<br>Bone mineral density variability 3 | Y | CiliaCut only  | Y |   | Merchant et al. (2007)  |
| <b>Intraflagellar transport, IFT (18)</b>  |                      |                                                                                                |          |                     |                                                                          |   |                |   |   |                         |
| <b>IFT complex A (2)</b>                   |                      |                                                                                                |          |                     |                                                                          |   |                |   |   |                         |
| GLS0803_17251                              | IFT140               | Intraflagellar transport protein IFT140                                                        | none     | Flagellar transport | Ip36 deletion syndrome; Bone mineral density variability 3               |   | CiliaCut only  |   |   | Hoeng et al. (2008)     |
| GLS0803_16547                              | IFT122               | Intraflagellar transport protein IFT122                                                        | none     | Flagellar transport |                                                                          |   |                |   |   | Briggs et al. (2004)    |
| <b>IFT complex B (8)</b>                   |                      |                                                                                                |          |                     |                                                                          |   |                |   |   |                         |
| GLS0803_17105                              | IFT172               | Intraflagellar transport protein IFT172                                                        | none     | Flagellar transport |                                                                          | Y | CiliaCut only  | Y | Y | Briggs et al. (2004)    |
| GLS0803_7664                               | IFT46                | Intraflagellar transport protein IFT46; FAP32                                                  | none     | Flagellar transport |                                                                          | Y |                | Y | Y | Briggs et al. (2004)    |
| GLS0803_112963                             | IFT52                | Intraflagellar transport protein IFT52; osm-6                                                  | none     | Flagellar transport |                                                                          | Y |                | Y | Y | Briggs et al. (2004)    |
| GLS0803_14713                              | IFT57                | Intraflagellar transport protein IFT57                                                         | none     | Flagellar transport |                                                                          | Y |                | Y | Y | Briggs et al. (2004)    |
| GLS0803_9750                               | IFT74/72             | Intraflagellar transport protein IFT74/72                                                      | none     | Flagellar transport |                                                                          | Y |                | Y | Y | Briggs et al. (2004)    |
| GLS0803_17223                              | IFT80                | Intraflagellar transport protein IFT80; WD domain, G-beta repeat                               | PF00400  | Flagellar transport |                                                                          | Y | CiliaCut only  | Y | Y | Briggs et al. (2004)    |
| GLS0803_15428                              | IFT81                | Intraflagellar transport protein IFT81                                                         | none     | Flagellar transport |                                                                          | Y |                | Y | Y | Hoeng et al. (2008)     |
| GLS0803_16660                              | IFT88                | Intraflagellar transport protein IFT88                                                         | none     | Flagellar transport | Bone mineral density variability 3; Mouse model: PKD, RP                 | Y |                | Y | Y | Briggs et al. (2004)    |
| <b>IFT complex B associated (4)</b>        |                      |                                                                                                |          |                     |                                                                          |   |                |   |   |                         |
| GLS0803_87202                              | DYF-1                | PR axonin;TPRS (FAP259)                                                                        | SSF48452 | Protein interaction | Duane retraction syndrome 2                                              | Y | CentricOnly    |   | Y | Merchant et al. (2007)  |
| GLS0803_16707                              | DYF-3                | Dl.erio cystic kidney disease gene alin; FAP22; Clusterin associated protein                   | PF10234  | Protein interaction |                                                                          | Y | CentricOnly    |   | Y | Merchant et al. (2007)  |
| GLS0803_9098                               | DYF-11               | MT Associated TRAF3 Interacting Protein (FAP116)                                               | PF10243  | Trafficking         |                                                                          | Y | CentricOnly    |   | Y | Merchant et al. (2007)  |
| GLS0803_16375                              | DYF-13               | (FBB2) required for ciliogenesis in C. elegans.                                                | SSF48452 | Protein interaction | Thromboxane synthase deficiency                                          | Y | CiliaCut only  |   | Y | Merchant et al. (2007)  |
| <b>IFT motors (4)</b>                      |                      |                                                                                                |          |                     |                                                                          |   |                |   |   |                         |
| GLS0803_114885                             | KAP                  | kinesin-associated protein; non-motor subunit of kinesin-II complex                            | PF05804  | Flagellar transport |                                                                          | Y | CentricOnly    |   |   | Morrison et al. (2007)  |
| GLS0803_16456                              | GIKIN2a              | kinesin-2                                                                                      | PF00225  | Flagellar transport |                                                                          |   |                |   |   | Hoeng et al. (2008)     |
| GLS0803_17333                              | GIKIN2b              | kinesin-2                                                                                      | PF00225  | Flagellar transport |                                                                          |   |                |   |   | Hoeng et al. (2008)     |
| GLS0803_93736                              | cytoDHC-1b           | cytoDHC1b, putative IFT cytoplasmic dynein 1b family                                           | PF03028  | Flagellar transport |                                                                          |   |                |   |   | Wickstead et al. (2007) |
| <b>MT motor proteins</b>                   |                      |                                                                                                |          |                     |                                                                          |   |                |   |   |                         |
| <b>Other Flagellar Kinesins (3)</b>        |                      |                                                                                                |          |                     |                                                                          |   |                |   |   |                         |
| GLS0803_16945                              | GIKIN13              | kinesin-13                                                                                     | PF00225  | MT Metabolism       |                                                                          |   |                |   |   | Dawson et al. (2007)    |
| GLS0803_10137                              | GIKIN9a              | kinesin-9                                                                                      | PF00225  | MT Metabolism       | Aicardi-Goutieres syndrome 1                                             |   | MotileCut only | Y |   | Wickstead et al. (2006) |
| GLS0803_6404                               | GIKIN9b              | kinesin-9                                                                                      | PF00225  | MT Metabolism       | Aicardi-Goutieres syndrome 1                                             |   | MotileCut only | Y |   | Wickstead et al. (2006) |
| <b>Other Dynein Heavy Chains (7)</b>       |                      |                                                                                                |          |                     |                                                                          |   |                |   |   |                         |
| GLS0803_17478                              | cytoDHC              | cytoDHC cytoplasmic dynein heavy chain family                                                  | PF03028  | MT Metabolism       |                                                                          |   |                |   |   | Wickstead et al. (2007) |
| GLS0803_103059                             |                      | dynein heavy chain (DHC) family                                                                | PF03028  | MT Metabolism       |                                                                          |   |                |   |   | Wickstead et al. (2007) |
| GLS0803_8172                               |                      | dynein heavy chain (DHC) family, partial                                                       | PF03028  | MT Metabolism       |                                                                          |   |                |   |   | Wickstead et al. (2007) |
| GLS0803_16804                              |                      | dynein heavy chain (DHC) family                                                                | PF03028  | MT Metabolism       |                                                                          |   |                |   |   | Wickstead et al. (2007) |
| GLS0803_101138                             |                      | dynein heavy chain (DHC) family                                                                | PF03028  | MT Metabolism       |                                                                          |   |                |   |   | Wickstead et al. (2007) |
| GLS0803_10538                              |                      | dynein heavy chain (DHC) family                                                                | PF03028  | MT Metabolism       |                                                                          |   |                |   |   | Wickstead et al. (2007) |
| GLS0803_29256                              |                      | axonemal dynein heavy chain, partial                                                           | PF03028  | MT Metabolism       |                                                                          |   |                |   |   | Wickstead et al. (2007) |
| <b>Dynein light chains (10)</b>            |                      |                                                                                                |          |                     |                                                                          |   |                |   |   |                         |
| GLS0803_4236                               | DYNLT1 (Tctex1/LC9)  | Tctex-1 family                                                                                 | PF03645  | MT Metabolism       |                                                                          |   |                |   |   | Wickstead et al. (2007) |
| GLS0803_4463                               | LC1                  | dynein light chain (DLC) family                                                                | PF01221  | MT Metabolism       |                                                                          |   |                |   |   | Wickstead et al. (2007) |
| GLS0803_7578                               | LCS?                 | dynein light chain (DLC) family                                                                | PF01221  | MT Metabolism       |                                                                          |   |                |   |   | Wickstead et al. (2007) |
| GLS0803_9848                               | LC8                  | dynein light chain (DLC) family                                                                | PF03645  | MT Metabolism       |                                                                          |   |                |   |   | Wickstead et al. (2007) |
| GLS0803_13575                              | DYNLT2 (Tctex2/LC19) | Tctex-1 family                                                                                 | PF01221  | MT Metabolism       |                                                                          |   |                |   |   | Wickstead et al. (2007) |
| GLS0803_14270                              | roadblock/LC7        | roadblock-related dynein light chain                                                           | PD03259  | MT Metabolism       |                                                                          |   |                |   |   | Wickstead et al. (2007) |
| GLS0803_27308                              | LC4                  | dynein light chain (DLC) family                                                                | PF01221  | MT Metabolism       |                                                                          |   |                |   |   | Wickstead et al. (2007) |
| GLS0803_15606                              | Tctex-1              | Tctex-1 family                                                                                 | PF03645  | MT Metabolism       |                                                                          |   |                |   |   | Wickstead et al. (2007) |
| GLS0803_17371                              | DYNLT1 (Tctex1/LC9)  | Tctex-1 family                                                                                 | PF03645  | MT Metabolism       |                                                                          |   |                |   |   | Wickstead et al. (2007) |
| GLS0803_15124                              | roadblock/LC7        | roadblock/LC7 domain family                                                                    | PD03259  | MT Metabolism       |                                                                          |   |                |   |   | Wickstead et al. (2007) |
| <b>Dynein light intermediate chain (1)</b> |                      |                                                                                                |          |                     |                                                                          |   |                |   |   |                         |
| GLS0803_13273                              | axonemal DLIC        | axonemal dynein light chain family, p28                                                        | PF10211  | MT Metabolism       | Deafness, autosomal dominant 2                                           | Y | CentricOnly    | Y | Y | Wickstead et al. (2007) |
| <b>Dynein intermediate chain (3)</b>       |                      |                                                                                                |          |                     |                                                                          |   |                |   |   |                         |
| GLS0803_6939                               | IC70                 | dynein intermediate chain (DIC) family                                                         | PF05783  | MT Metabolism       |                                                                          |   |                |   |   | Wickstead et al. (2007) |
| GLS0803_10254                              | IC138                | dynein intermediate chain (DIC) family                                                         | PF05783  | MT Metabolism       |                                                                          |   |                |   |   | Wickstead et al. (2007) |
| GLS0803_33218                              | IC78                 | dynein intermediate chain (DIC) family; Flagellar outer dynein arm intermediate chain, ODA-IC1 | PF05783  | MT Metabolism       |                                                                          | Y | CentricOnly    | Y | Y | Wickstead et al. (2007) |
